# Supplementary material for: Tailoring the Properties of Optical Force Probes for Polymer Mechanochemistry
Source: PubMed Central journal article supplement — Chemistry. 2021 Oct 13;27(64):15889–97. doi: 10.1002/chem.202102938 (PMC9292383; doi:10.1002/chem.202102938), 2021-10-13
Supplement: CHEM-27-15889-s001.pdf [file CHEM-27-15889-s001.pdf]

## **Author Contributions**

S.H. Conceptualization:Equal; Methodology:Equal; Validation:Equal; Visualization:Equal; Writing – original draft:Equal; Writing – review & editing:Equal

M.S. Conceptualization:Equal; Methodology:Equal; Validation:Equal; Visualization:Equal; Writing – original draft:Equal; Writing – review & editing:Equal

S.C. Conceptualization:Equal; Writing – original draft:Equal; Writing – review & editing:Equal

A.D. Conceptualization:Supporting; Validation:Supporting; Writing – original draft:Supporting; Writing – review & editing:Supporting

R.G. Funding acquisition:Lead; Investigation:Equal; Methodology:Equal; Project administration:Lead; Supervision:-Lead; Validation:Lead; Visualization:Equal; Writing – original draft:Equal; Writing – review & editing:Equal
